# Supplementary material
Source: PubMed Central journal article supplement (PMC3346439)
Supplement: supp_78.9.3045_AEM-AEM07465-11-s01.pdf [file supp_78.9.3045_AEM-AEM07465-11-s01.pdf]

## Supplemental Material for Online Posting

**Supplemental Figure 1.** Cluster analysis based on gene present, partial present and absent detected on the array for the five *leptospira* strains. a): Present genes varies among strains; b) and c): Genes were present in all the strains or partially present in the two *kirschneri* strains; d): Genes were either only present in Br, Ca and He (cluster IV), or only present Ca (cluster V)
