# Supplementary material
Source: PubMed Central journal article supplement (PMC3346439)
Supplement: supp_78.9.3045_AEM-AEM07465-11-s03.pdf [file supp_78.9.3045_AEM-AEM07465-11-s03.pdf]

LA1860 Sensor protein of a two component response regulator  
LIC12031 Sensor protein of a two component response regulator  
LIC13289 Sensor histidine kinase of a two component response regulator  
LA4127 Sensor histidine kinase of a two component response regulator  
LA4126 Sensor histidine kinase of a two component response regulator  
LIC13288 Sensor histidine kinase of a two component response regulator  
LIC10552 Sensor histidine kinase and response regulator protein of a two component complex  
LA3662 Sensor histidine kinase and response regulator protein of a two component complex  
LIC20224 Sensor histidine kinase and response regulator of a two component complex, inframe stop  
LB290 Sensor histidine kinase and response regulator of a two component complex  
LA1114 Ring-hydroxylating dioxygenase  
LIC12562 Ring-hydroxylating dioxygenase  
LIC10994 Response regulator  
LA1432 Receiver protein of a two-component response regulator  
LIC12316 Receiver protein of a two-component response regulator  
LA0385 Receiver component of a two-response regulator  
LIC10332 Receiver component of a two-response regulator  
LA4281 Receiver component of a two-component response regulator  
LIC10991 Potassium-transporting ATPase B chain  
LIC12116 PIN domain protein  
LIC13261 PhzC/PhzF-related epimerase  
LA4089 PhzC/PhzF-related epimerase  
LIC20047 Phosphatase  
LB061 Phosphatase  
LIC12615 Phage-related protein  
LA1052 Phage-related protein  
LIC12608 Phage-related protein  
LA1059 Phage-related protein  
LA1062 Phage-related protein  
LIC12605 Phage-related protein  
LIC12604 Phage-related protein  
LA3539 Permease  
LIC13002 Outer membrane transport protein  
LA4244 OsmC/Ohr family protein  
LIC13395 OsmC/Ohr family protein  
LIC12500 Methyl-accepting chemotaxis protein  
LA2246 Methyl-accepting chemotaxis protein  
LIC11691 Methyl-accepting chemotaxis protein  
LIC12256 Metalloproteinase  
LIC11180 Leucine-rich repeat protein  
LA3661 Hydrolase or acyltransferase, alpha/beta hydrolase superfamily  
LIC12910 Helicase  
LA0690 Helicase  
LIC12911 Helicase  
LIC10838 GlvXalase  
LA3312 GlvXalase  
LIC11642 Glucose/sorbose dehydrogenase  
LIC20182 GGDEF family protein  
LB240 GGDEF family protein  
LIC11191 Transcriptional regulator HTH domain  
LA2845 Transcriptional regulator HTH domain  
LIC13185 Transcriptional regulator, AraC family  
LA4131 Zinc dependent protease  
LIC13293 Zinc dependent protease  
LIC13321 Zinc metalloprotease (elastase)  
LIC13320 Zinc metalloprotease (elastase)  
LA4161 Zinc metalloprotease (elastase)  
LA2190 2-dehydropanoate 2-reductase  
LIC10637 Acetyltransferase  
LA3557 Acetyltransferase  
LIC10541 Acetyltransferase (isoleucine patch superfamily)  
LA3740 AcrB-like Cation/multidrug efflux pump  
LIC12551 Acyl-CoA dehydrogenase  
LIC12670 Adenylate cyclase related protein  
LIC11198 Adenylate/guanylate cyclase  
LIC12506 Adenylate/guanylate cyclase  
LIC13072 Adenylate/guanylate cyclase  
LIC11045 Adenylate / guanylyl cyclase  
LIC12392 Amidase  
LIC10589 Ammonium transporter  
LA3029 Ankyrin repeat protein  
LIC13291 Ankyrin repeat protein  
LB136 Anti-sigma factor antagonist  
LIC20108 Anti-sigma factor antagonist  
LB133 EAL domain protein  
LIC20106 EAL domain protein  
LA3846 Efflux pump, AcrB family  
LIC13074 Efflux pump, AcrB family  
LIC13053 Fatty acid desaturase  
LA1074 Fumarylacetoacetate hydrolase family protein  
LB183 FUR family transcriptional regulator  
LIC20147 FUR family transcriptional regulator  
LA2933 GGDEF domain protein  
LA2932 GGDEF domain protein  
LIC11126 GGDEF domain protein  
LIC11127 GGDEF domain protein  
LA2931 GGDEF domain protein  
LIC11128 GGDEF domain protein  
LA2930 GGDEF domain protein  
LA2927 GGDEF domain protein
