# Supplementary material
Source: PubMed Central journal article supplement (PMC3346439)
Supplement: supp_78.9.3045_AEM-AEM07465-11-s04.pdf [file supp_78.9.3045_AEM-AEM07465-11-s04.pdf]

LA3050 Sphingomyelinase  
LIC11634 Short chain dehydrogenase  
LA2303 Short chain dehydrogenase  
LA2533 Sensor histidine kinase of a two component response regulator  
LIC11439 Sensor histidine kinase of a two component response regulator  
LIC10993 Sensor histidine kinase  
LIC10657 Sphingomyelinase C precursor  
LIC13427 Receiver component of a two-component response regulator  
LA3111 Potassium-transporting ATPase B chain  
LIC10990 Potassium-transporting ATPase A chain  
LA1063 Phage-related protein  
LIC10165 Phage-related protein  
LIC13140 Phage-like protein  
LIC12632 Sphingomyelinase C precursor  
LIC10658 Permease  
LA0568 Outer membrane transport protein  
LA1644 NDP-sugar dehydratase or epimerase  
LIC13198 Sphingomyelinase C precursor  
LA1191 Methyl-accepting chemotaxis protein  
LA1504 Metalloproteinase  
LIC11068 Lysozyme  
LIC12764 Thiamine pyrophosphate-requiring enzyme  
LB103 Thioesterase  
LIC20080 Thioesterase  
LIC12998 TonB dependent receptor  
LIC10553 Hydrolase or acyltransferase, alpha/beta hydrolase superfamily  
LIC13077 Hydrolase or acyltransferase  
LA3851 Hydrolase or acyltransferase  
LIC11465 Hydrolase or acyltransferase  
LA2958 Hydrolase / acyltransferase  
LA0689 Helicase  
LIC10492 Heavy metal efflux pump  
LA0572 TonB dependent receptor  
LIC10331 Glycosyltransferase and UDP-glucose lipid carrier transferase  
LA0384 Glycosyltransferase and UDP-glucose lipid carrier transferase  
LIC11296 Glycosyltransferase  
LA1370 Glycosylase  
LIC12362 Glycosylase  
LA2296 Glucose/sorbosone dehydrogenase  
LA0341 GlcG related protein  
LIC10294 GlcG related protein  
LIC11131 GGDEF domain protein  
LA2926 GGDEF domain protein  
LIC11130 GGDEF domain protein  
LIC11125 GGDEF domain protein  
LIC12595 Fumarylacetoacetate hydrolase family protein  
LA0779 Fatty acid desaturase  
LIC12838 Fatty acid desaturase  
LA3832 DNA-3-methyladenine glycosylase I  
LIC13064 DNA-3-methyladenine glycosylase I  
LA2908 Dehydrogenase  
LIC13467 C-type lectin-related protein  
LA4324 C-type lectin-related protein  
LA3986 Transcriptional regulator, AraC family  
LA0984 ATP-dependent DNA ligase  
LIC12677 ATP-dependent DNA ligase  
LA1174 ATP Binding protein of an ABC transporter complex  
LA4129 Ankvrin repeat protein  
LA2264 Ankvrin repeat protein  
LIC11050 Ankvrin repeat protein  
LA3622 Ammonium transporter  
LA4164 Zinc metalloproteinase (elastase)  
LA3679 Acetyltransferase  
LIC10836 Acetyltransferase  
LA2556 Acetyltransferase  
LA3739 AcrB-like Cation/multidrug efflux pump  
LIC10490 AcrB-like Cation/multidrug efflux pump  
LIC10491 AcrB-like Cation/multidrug efflux pump  
LB104 AcrR-family transcriptional regulator  
LA1130 Acyl-CoA dehydrogenase  
LA4117 Acyl-CoA dehydrogenase  
LIC13281 Acyl-CoA dehydrogenase  
LIC20094 Adenylate or guanylate cyclase  
LIC11297 Phospholipid synthase/methyltransferase  
LA1580 Nucleoside-diphosphate-sugar epimerase  
LA2709 Glycosyltransferase  
LA1582 ADP-heptose synthase
