# Supplementary material
Source: PubMed Central journal article supplement (PMC3346439)
Supplement: supp_78.9.3045_AEM-AEM07465-11-s05.pdf [file supp_78.9.3045_AEM-AEM07465-11-s05.pdf]

Br  
Ca  
Gr  
Cu  
He

LA1633 RmlC-related protein  
LIC10527 Protein-tyrosine-phosphatase  
LA2028 Prohibitin family protein  
LIC11881 Prohibitin family protein  
LA1416 Phosphonmutase  
LIC12331 Phosphonmutase  
LA2879 Nucleotidyltransferase  
LIC11165 Nucleotidyltransferase  
LA3314 Nucleoside-diphosphate-sugar epimerase  
LIC10837 Nucleoside-diphosphate-sugar epimerase  
LA0873 Leucine-rich repeat protein  
LIC12759 Leucine-rich repeat protein  
LA0864 Thiamine pyrophosphate-requiring enzyme  
LIC11097 Leucine-rich repeat protein  
LIC12226 Hydrolase of the alpha/beta superfamily  
LA1541 Hydrolase of the alpha/beta superfamily  
LIC11146 Transcriptional regulator  
LA2907 Transcriptional regulator  
LIC10935 Fruiting body developmental protein S-like protein  
LA3192 Fruiting body developmental protein R-like protein  
LIC10936 Fruiting body developmental protein R-like protein  
LIC11145 Dehydrogenase  
LIC10938 ATP-dependent RNA helicase  
LA3190 ATP-dependent RNA helicase  
LA1299 Ankyrin repeat protein  
LIC12419 Ankyrin repeat protein  
LIC12115 Ankyrin repeat protein  
LA1671 Ankyrin repeat protein  
LIC11673 Ankyrin repeat protein  
LIC11104 Aminopeptidase  
LA2957 Aminopeptidase  
LA3315 Acetyltransferase  
LA2263 Ankyrin repeat protein  
LIC12150 RmlC-related protein  
LA1638 Polysaccharide deacetylase  
LIC12146 Polysaccharide deacetylase  
LIC12171 Nucleoside-diphosphate-sugar pyrophosphorylase  
LA1611 Nucleoside-diphosphate-sugar pyrophosphorylase  
LIC12151 Nucleoside-diphosphate-sugar epimerase  
LIC10505 Nuclease  
LA3720 Nuclease  
LIC12177 N-acetylneuraminic acid cytidyltransferase  
LIC12167 N-acetylneuraminic acid cytidyltransferase  
LIC12169 N-acetylneuraminic (sialic) acid synthetase and isomerase/epimerase  
LA1602 Methylase/methyltransferase  
LIC12180 Methylase/methyltransferase  
LIC12164 Methylase/methyltransferase  
LA1618 Methylase/methyltransferase  
LIC12181 Sugar isomerase  
LA1601 Sugar isomerase  
LA2964 Leucine-rich repeat protein  
LIC12179 Glycosyltransferase  
LA1603 Glycosyltransferase  
LIC12148 Glycosyltransferase  
LA1635 Glycosyltransferase  
LIC12152 Glycosyl-nucleotidyl transferase  
LIC12149 Glucose galactose epimerase  
LA1634 Glucose galactose epimerase  
LIC12165 Fe-S oxidoreductase  
LA1600 ATP-binding protein of an ABC transporter complex  
LIC12175 Aminotransferase  
LA1607 Aminotransferase  
LA1614 Aminotransferase  
LIC12168 Aminotransferase  
LIC12145 Aminotransferase  
LA1639 Aminotransferase  
LIC12174 Acetyltransferase  
LA1608 Acetyltransferase  
LIC12184 Acetyltransferase  
LA1598 Acetyltransferase  
LIC12182\_ ATP-binding protein of an ABC transporter complex
