# Supplementary material
Source: PubMed Central journal article supplement (PMC3346439)

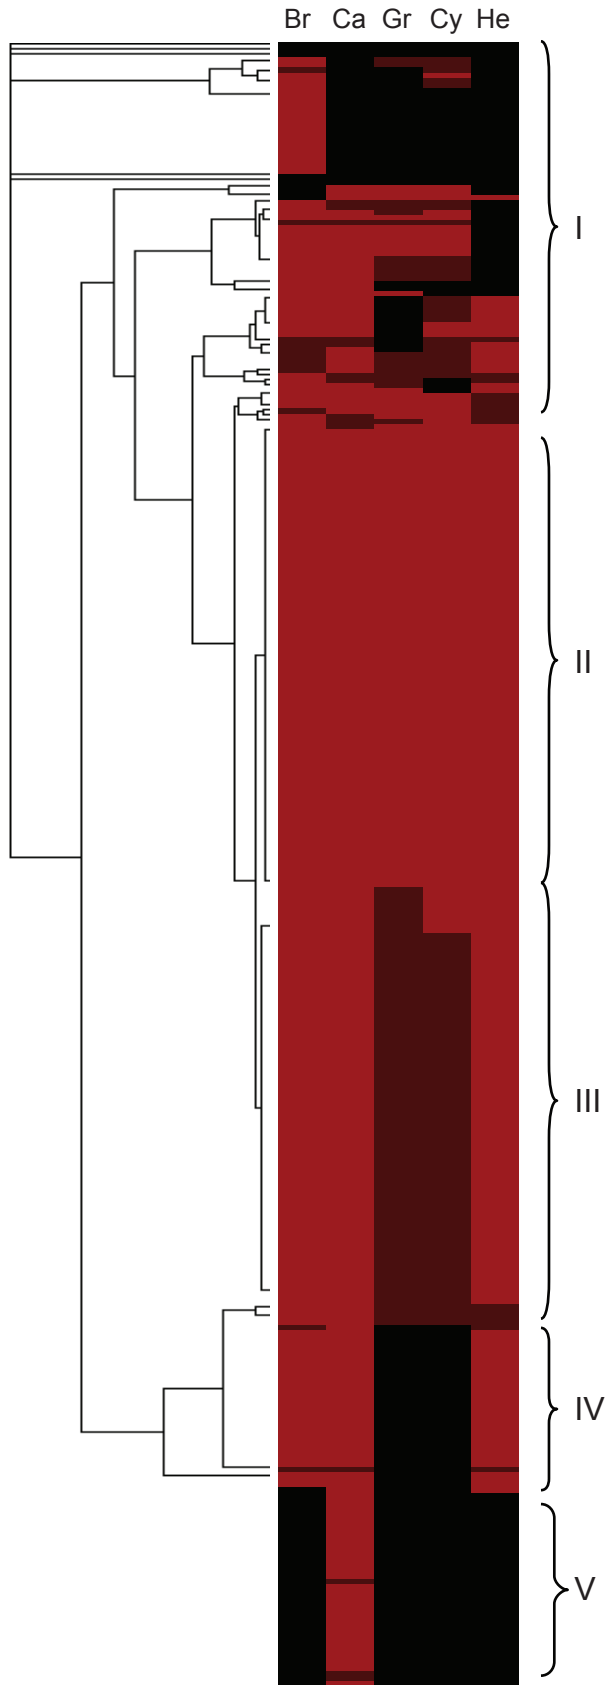

Supplement: supp_78.9.3045_AEM-AEM07465-11-s02.pdf [file supp_78.9.3045_AEM-AEM07465-11-s02.pdf]
